# Supplementary material for: Prediction and stratification of longitudinal risk for chronic obstructive pulmonary disease across smoking behaviors
Source: PubMed Central journal article supplement (PMC10721891; doi:10.1038/s41467-023-44047-8), 2023-12-14
Supplement: 41467_2023_44047_MOESM3_ESM.pdf [file 41467_2023_44047_MOESM3_ESM.pdf]

## **Description of Additional Supplementary Files:**

**Supplementary Data 1:** Summary statistics from exposure-wide association study.

**Supplementary Data 2:** SERS model weights, responses in bold are significant ( $p < 0.05$ ) in the multivariable model.

**Supplementary Data 3:** Hazard ratio of each SERS decile compared to the first decile in the EUR evaluation subset.

**Supplementary Data 4:** Hazard ratio of each PGS decile compared to the first decile in the EUR evaluation subset.

**Supplementary Data 5:** Prediction of COPD incidence in subsampled populations of the UK Biobank (N=1500). The absolute C index and its standard errors (SE) are shown in each model without adjusting for covariates.
